# Supplementary material for: PolyMOF nanoparticles constructed from intrinsically microporous polymer ligand towards scalable composite membranes for CO2 separation
Source: PubMed Central journal article supplement (PMC10721836; doi:10.1038/s41467-023-44027-y), 2023-12-14
Supplement: 41467_2023_44027_MOESM1_ESM.pdf [file 41467_2023_44027_MOESM1_ESM.pdf]

## **Supplementary Information**

### **PolyMOF nanoparticles constructed from intrinsically microporous polymer ligand towards scalable composite membranes for CO<sub>2</sub> separation**

Tae Hoon Lee<sup>1,2</sup>, Byung Kwan Lee<sup>1</sup>, Seung Yeon Yoo<sup>1</sup>, Hyunhee Lee<sup>2</sup>, Wan-Ni Wu<sup>2</sup>, Zachary P. Smith<sup>2</sup>, and Ho Bum Park<sup>1,\*</sup>

<sup>1</sup>Department of Energy Engineering, Hanyang University, Seoul 04763, Republic of Korea

<sup>2</sup>Department of Chemical Engineering, Massachusetts Institute of Technology, Cambridge, Massachusetts 02139, United States

#### **Corresponding Author**

\*E-mail: [badtzhb@hanyang.ac.kr](mailto:badtzhb@hanyang.ac.kr) (H. B. Park)

## Supplementary Note 1. Synthesis of cPIM-1

An acid hydrolysis method catalyzed by sulfuric acid was used to prepare carboxylated PIM-1 (cPIM-1) due to its fast reaction rate and high conversion rate, which is illustrated in Supplementary Fig. 1<sup>1</sup>. Fourier-transform infrared (FT-IR) spectra of cPIM-1 exhibited the absence of a  $\text{-CN}$  group at  $2240\text{ cm}^{-1}$ , a broad  $\text{-OH}$  stretch at  $\sim 3400\text{ cm}^{-1}$ , and a strong  $\text{-C=O}$  peak at  $1724\text{ cm}^{-1}$ , which confirm the successful conversion of  $\text{-CN}$  into carboxylic acid ( $\text{-COOH}$ ) groups (Supplementary Fig. 2). Also, the mass loss between  $300$  and  $500^\circ\text{C}$  detected from thermogravimetric analysis (TGA) for cPIM-1 indicates the decomposition of  $\text{-COOH}$  groups (Supplementary Fig. 3). Due to the strong intermolecular interactions between  $\text{-COOH}$  groups in cPIM-1 chains, x-ray diffraction (XRD) patterns confirmed that the average pore sizes (i.e.,  $d$ -spacings) of PIM-1 were reduced for cPIM-1 (Supplementary Fig. 4). cPIM-1 showed a lower Brunauer–Emmett–Teller (BET) surface area of  $591\text{ m}^2\text{ g}^{-1}$  compared to that of PIM-1 ( $861\text{ m}^2\text{ g}^{-1}$ ) evaluated by  $\text{N}_2$  sorption isotherms at  $77\text{ K}$  (Supplementary Fig. 5).

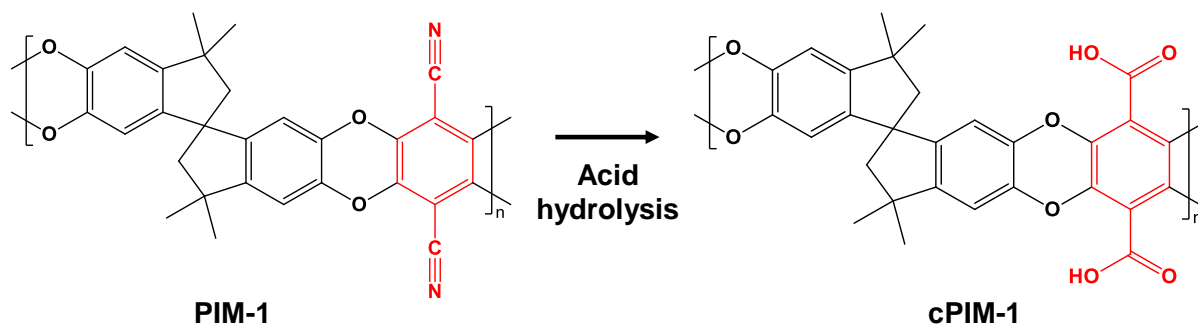

**Supplementary Fig. 1.** Chemical structures of PIM-1 and carboxylated PIM-1 (cPIM-1).

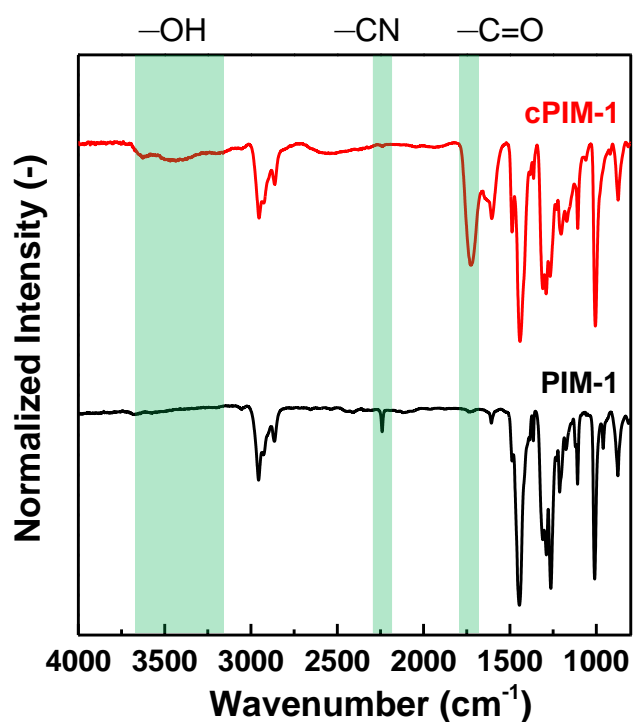

**Supplementary Fig. 2.** FT-IR spectra of PIM-1 and cPIM-1. cPIM-1 exhibits the absence of a  $-\text{CN}$  group at  $2240 \text{ cm}^{-1}$ , a broad  $-\text{OH}$  stretch at  $\sim 3400 \text{ cm}^{-1}$ , and a strong  $-\text{C}=\text{O}$  peak at  $1724 \text{ cm}^{-1}$ .

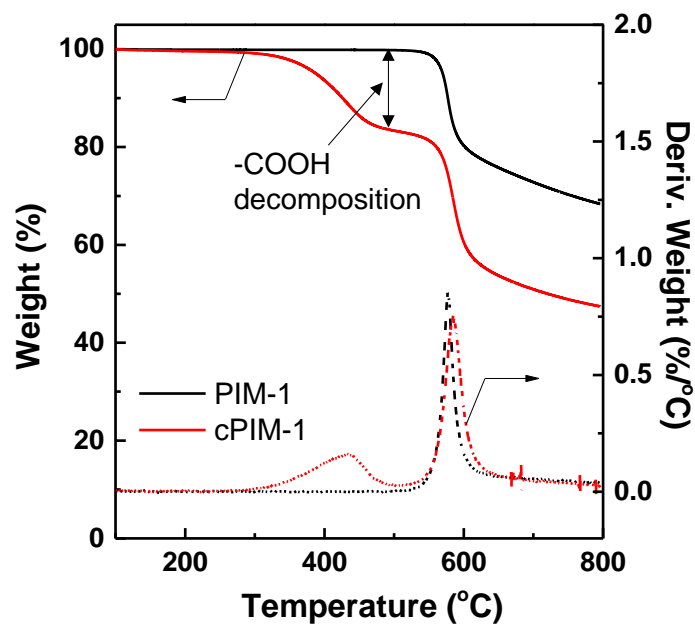

**Supplementary Fig. 3.** TGA curves of PIM-1 and cPIM-1 measured at 10°C/min ramp rate under N<sub>2</sub> purge.

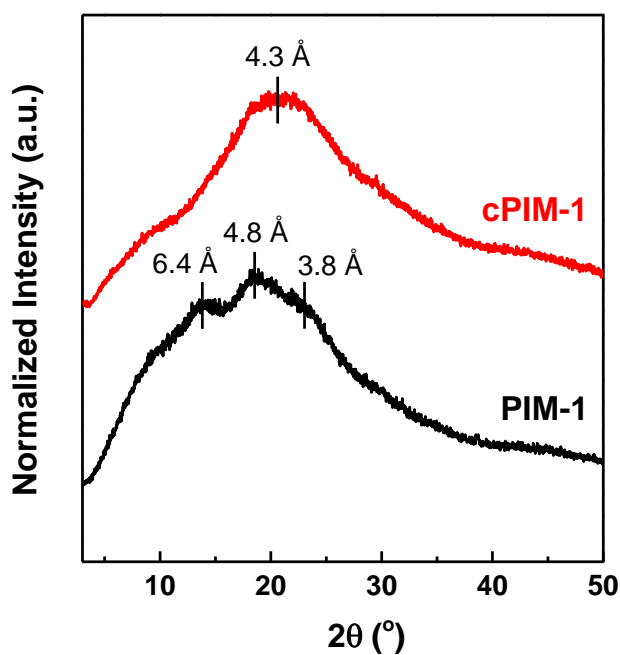

**Supplementary Fig. 4.** XRD patterns of PIM-1 and cPIM-1.

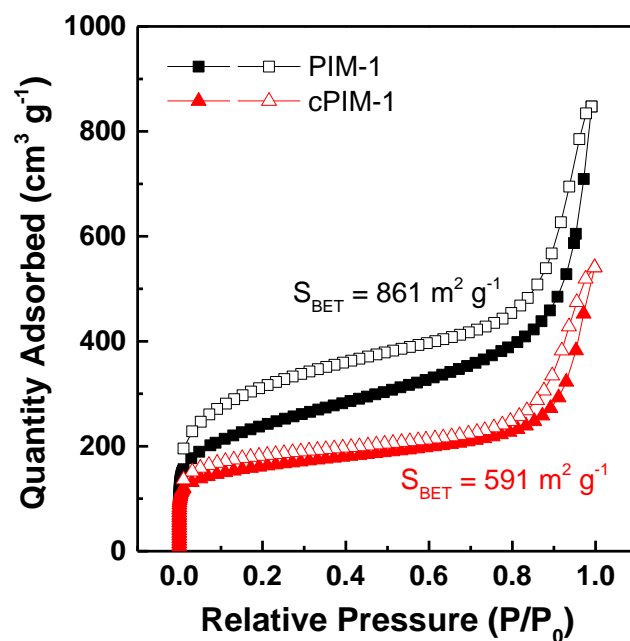

**Supplementary Fig. 5.**  $\text{N}_2$  sorption isotherms at 77 K and BET surface area ( $S_{\text{BET}}$ ) of PIM-1 and cPIM-1.

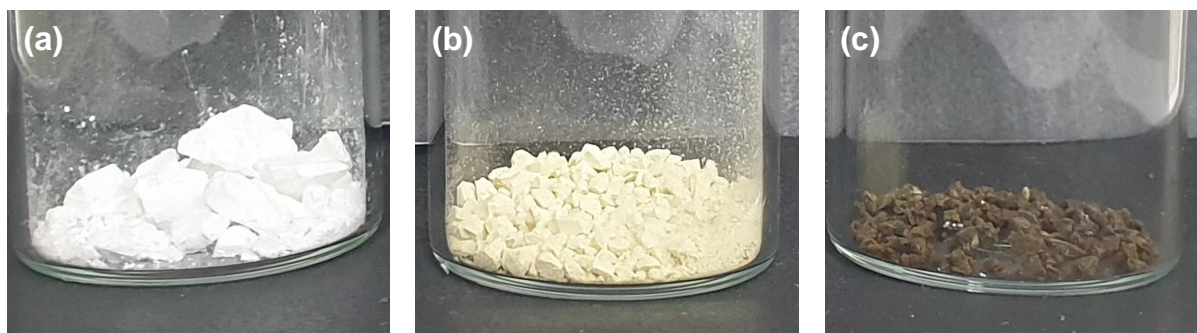

**Supplementary Fig. 6.** Photo images of (a) UiO-66, (b) polyUiO-66(4:1), and (c) polyUiO-66(0:1) powder.

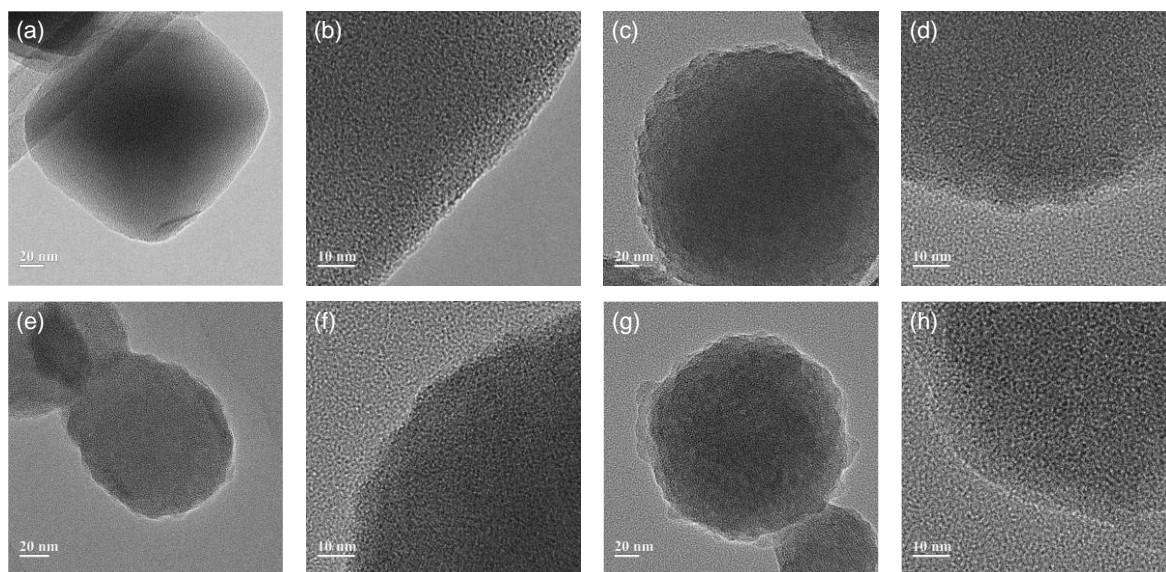

**Supplementary Fig. 7.** High-resolution TEM images of (a-b) UiO-66, (c-d) polyUiO-66(8:1), (e-f) polyUiO-66(4:1), and (g-h) polyUiO-66(2:1).

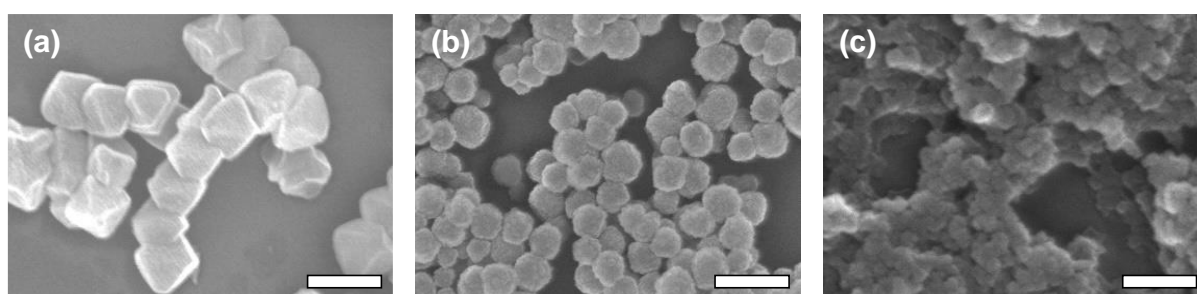

**Supplementary Fig. 8.** SEM images of (a) UiO-66, (b) polyUiO-66(4:1), and (c) polyUiO-66(0:1) powder (scale bar = 200 nm).

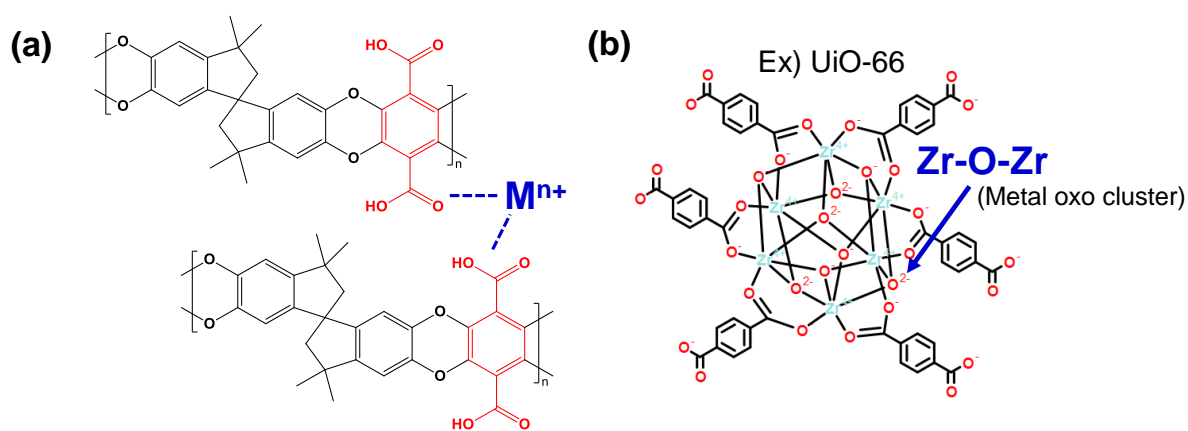

**Supplementary Fig. 9.** Schematic illustration of possible interactions between metal ions and cPIM-1 ligand: (a) ionic crosslinking and (b) coordination with metal oxo cluster.

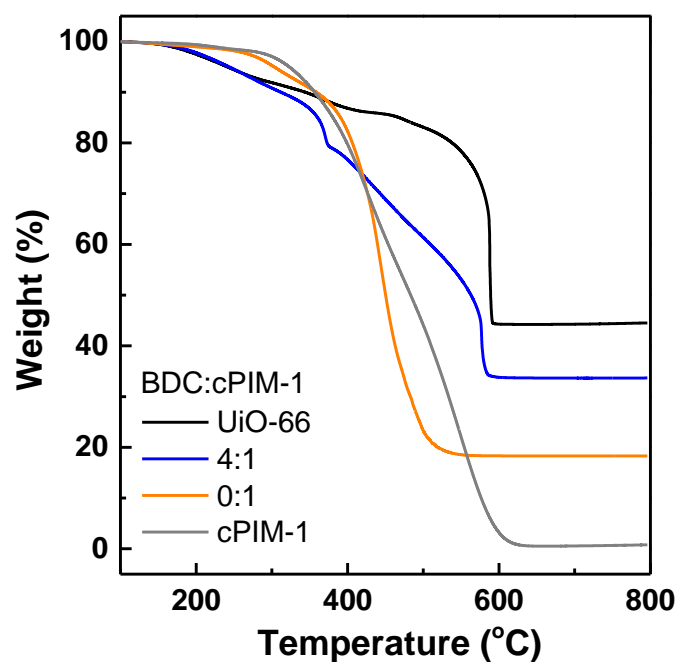

**Supplementary Fig. 10.** TGA curves of cPIM-1, UiO-66, polyUiO-66(4:1), and polyUiO-66(0:1) measured at 10°C/min ramp rate under air purge.

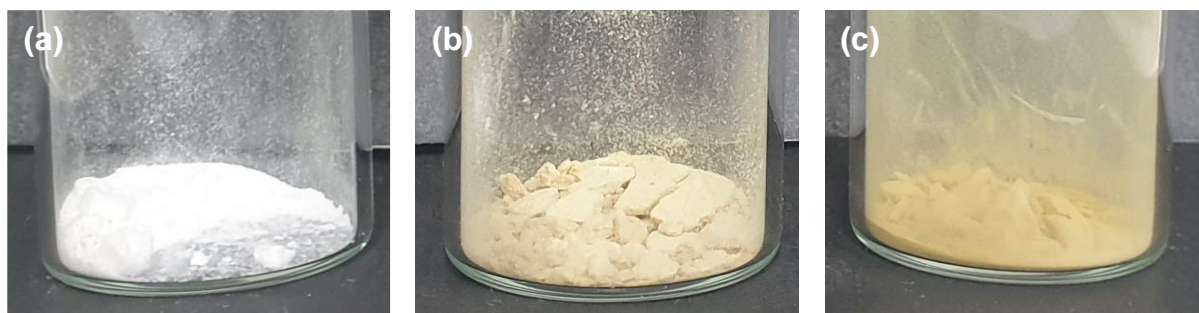

**Supplementary Fig. 11.** Photo images of (a) MOF-5, (b) polyMOF-5(4:1), and (c) polyMOF-5(0:1) powder.

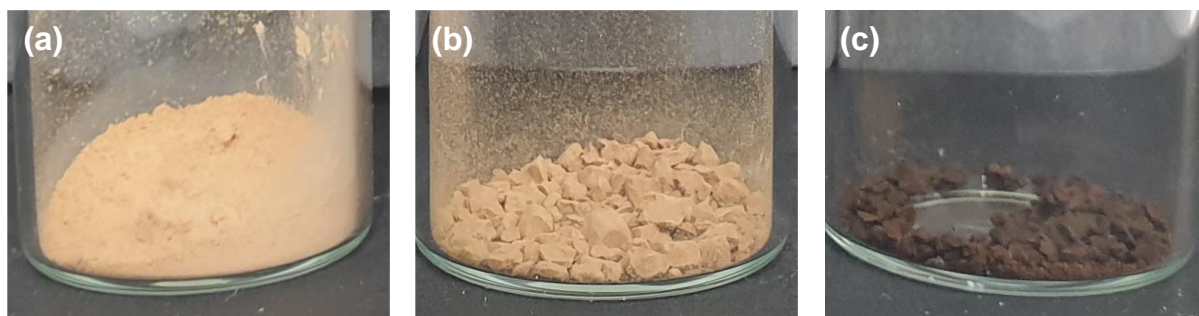

**Supplementary Fig. 12.** Photo images of (a) MIL-101, (b) polyMIL-101(4:1), and (c) polyMIL-101(0:1) powder.



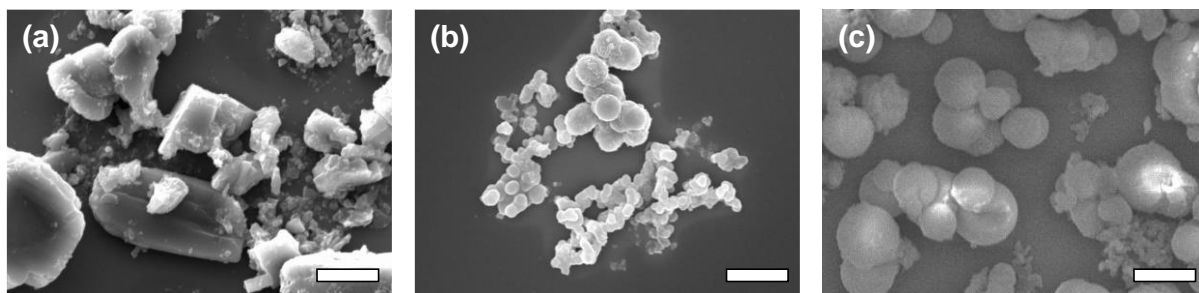

**Supplementary Fig. 13.** SEM images of (a) MOF-5, (b) polyMOF-5(4:1), and (c) polyMOF-5(0:1) powder (scale bar = 5  $\mu\text{m}$ ).

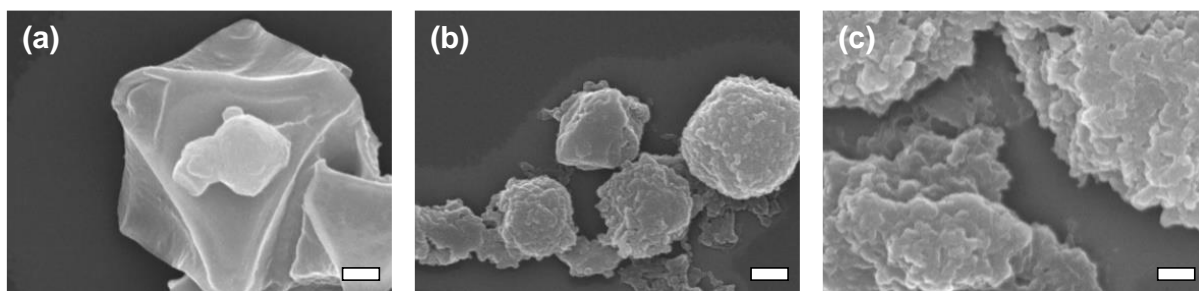

**Supplementary Fig. 14.** SEM images of (a) MIL-101, (b) polyMIL-101(4:1), and (c) polyMIL-101(0:1) powder (scale bar = 200 nm).

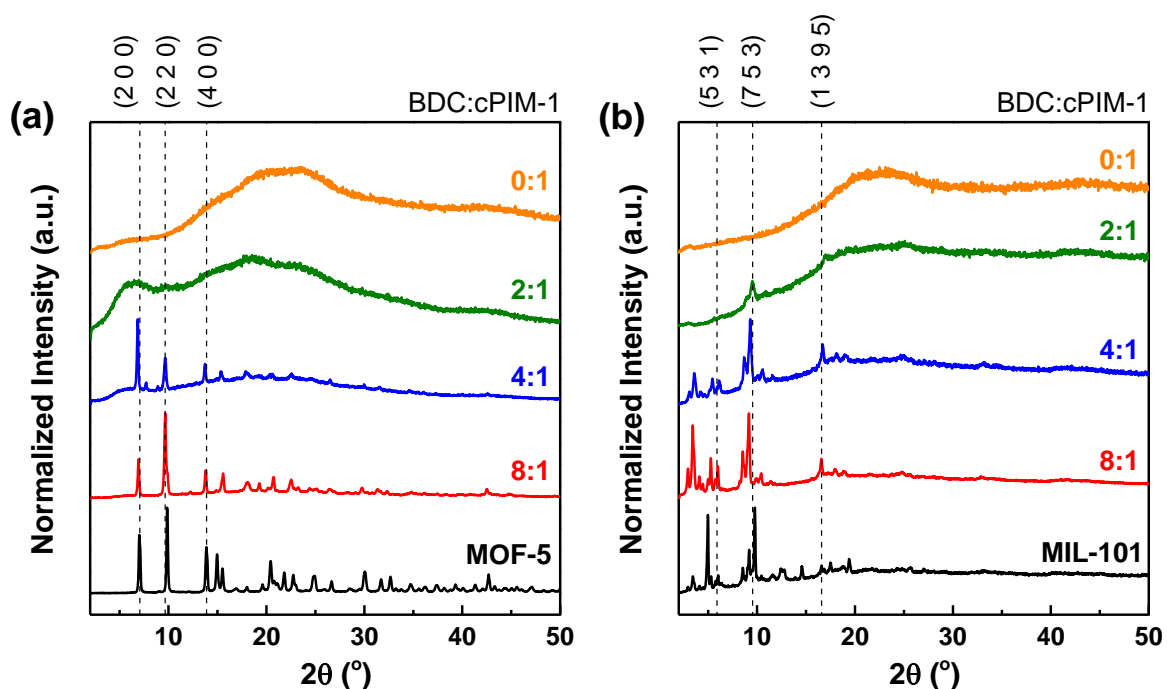

**Supplementary Fig. 15.** Powder XRD patterns of (a) polyMOF-5<sup>2</sup> and (b) polyMIL-101<sup>3</sup> samples depending on BDC:cPIM-1 ratio used for their synthesis.



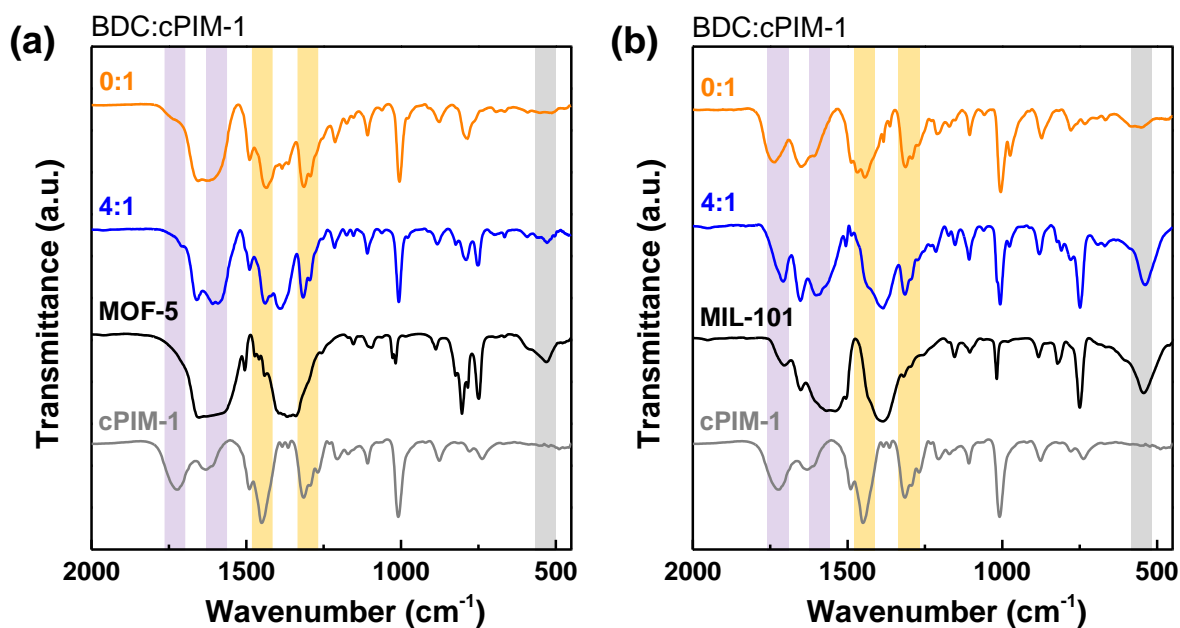

**Supplementary Fig. 16.** FT-IR spectra of (a) polyMOF-5 and (b) polyMIL-101 samples depending on BDC:cPIM-1 ratio used for their synthesis. The yellow highlighted peaks at  $\sim 1450$  and  $\sim 1310$   $\text{cm}^{-1}$  correspond to the methylene ( $\text{CH}_2$ ) stretching/bending vibration modes and the C–O stretching mode, respectively. The purple highlighted peaks indicate that the carboxylate bands at  $1724$   $\text{cm}^{-1}$  for cPIM-1 were significantly red-shifted. The gray highlights represent the presence of metal oxo clusters ( $\text{Zn}_4\text{O}$  for MOF-5<sup>4</sup> and  $\text{Fe}_3\text{O}$  for MIL-101<sup>3</sup>, respectively).

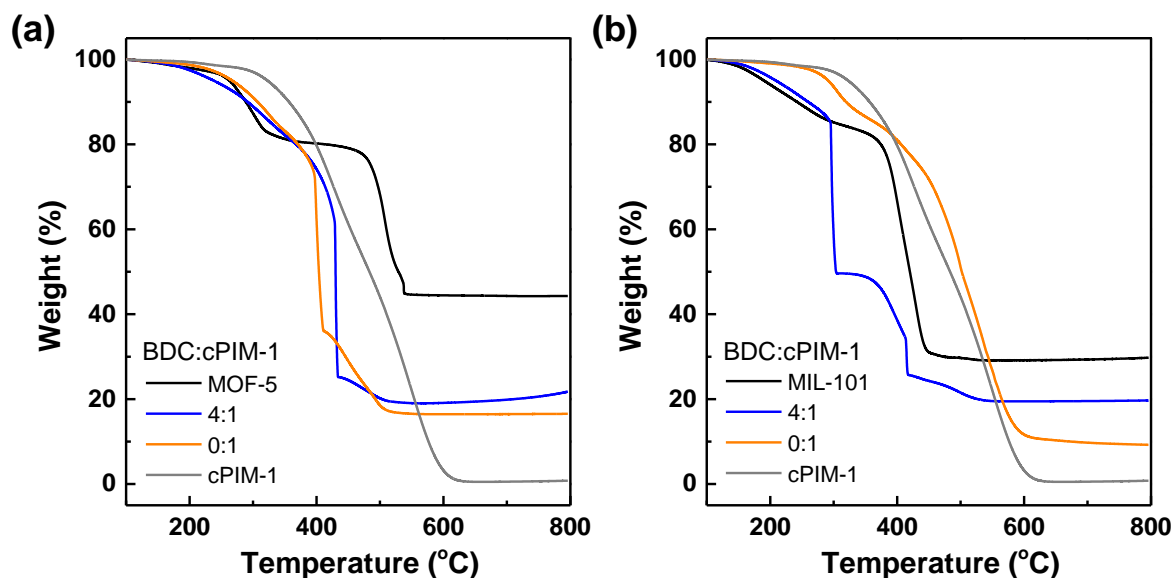

**Supplementary Fig. 17.** TGA curves of (a) polyMOF-5 and (b) polyMIL-101 samples for various BDC:cPIM-1 ratios used for their synthesis. The weight losses were measured at  $10$   $^\circ\text{C}/\text{min}$  ramp rate under flowing air.

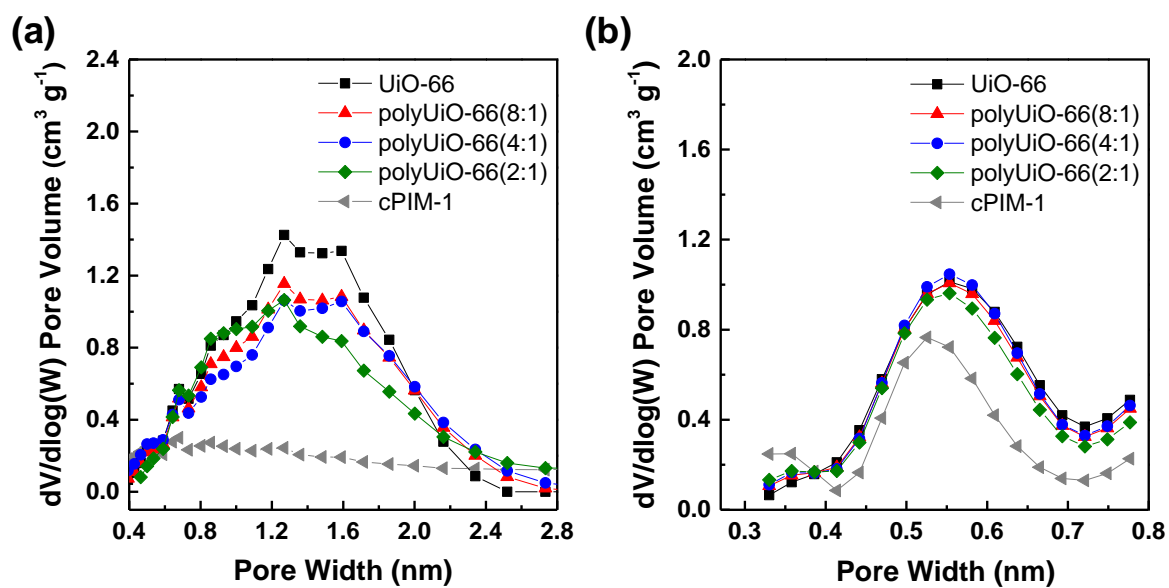

**Supplementary Fig. 18.** NLDFT pore size distributions of polyUiO-66 nanoparticles calculated from (a) the N<sub>2</sub> adsorption isotherm at 77 K and (b) the CO<sub>2</sub> adsorption isotherm at 273 K. polyUiO-66(0:1) was excluded due to its essentially nonporous nature.

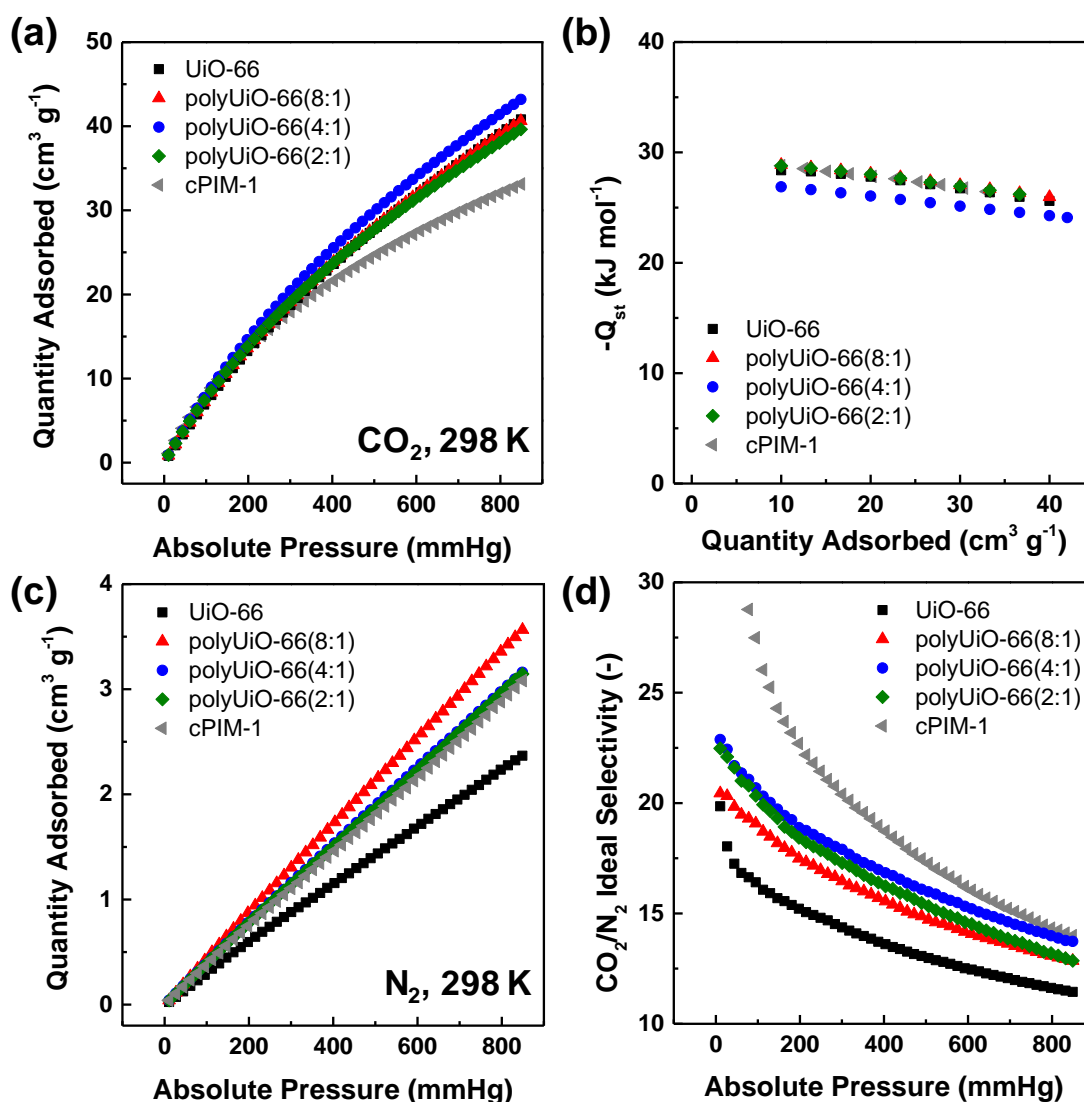

**Supplementary Fig. 19.** (a) CO<sub>2</sub> adsorption isotherms at 298 K, (b) isosteric heats for CO<sub>2</sub> adsorption, (c) N<sub>2</sub> adsorption isotherms at 298 K, and (d) single gas ideal selectivity calculated from (a) and (c) of polyUiO-66 samples. The single gas ideal selectivity ( $\alpha$ ) in (d) was calculated as  $\alpha = N_{CO_2}/N_{N_2}$  where  $N_{CO_2}$  and  $N_{N_2}$  represent the adsorption amount of CO<sub>2</sub> and N<sub>2</sub> at a certain equilibrium pressure at 298 K<sup>5</sup>.

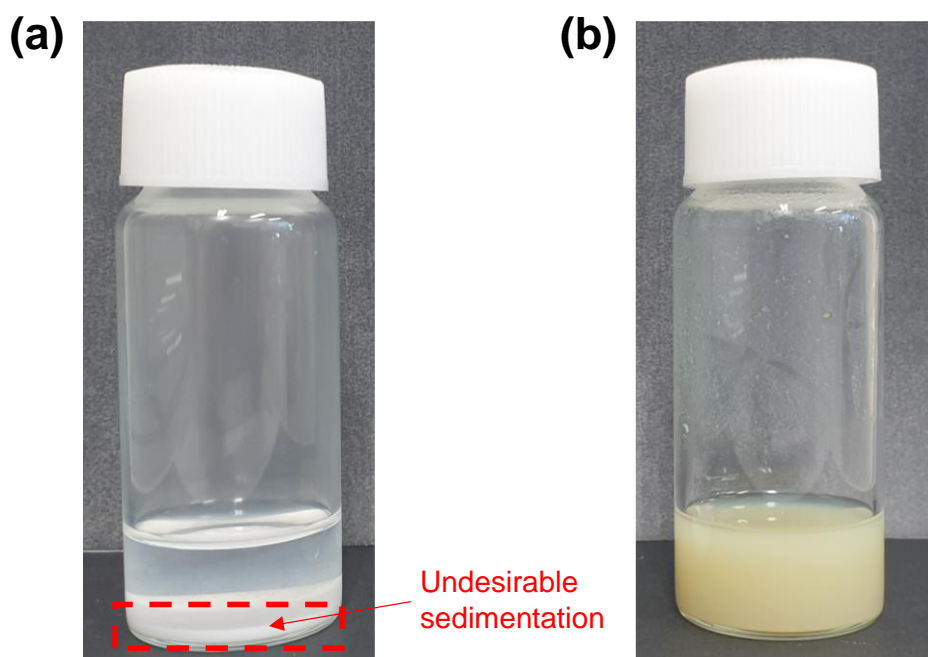

**Supplementary Fig. 20.** Photo images of the high-concentration ( $8 \text{ mg ml}^{-1}$  in THF) colloidal stability of (a) UiO-66 and (b) polyUiO-66(4:1) nanoparticles 24 h after the as-dispersed state.

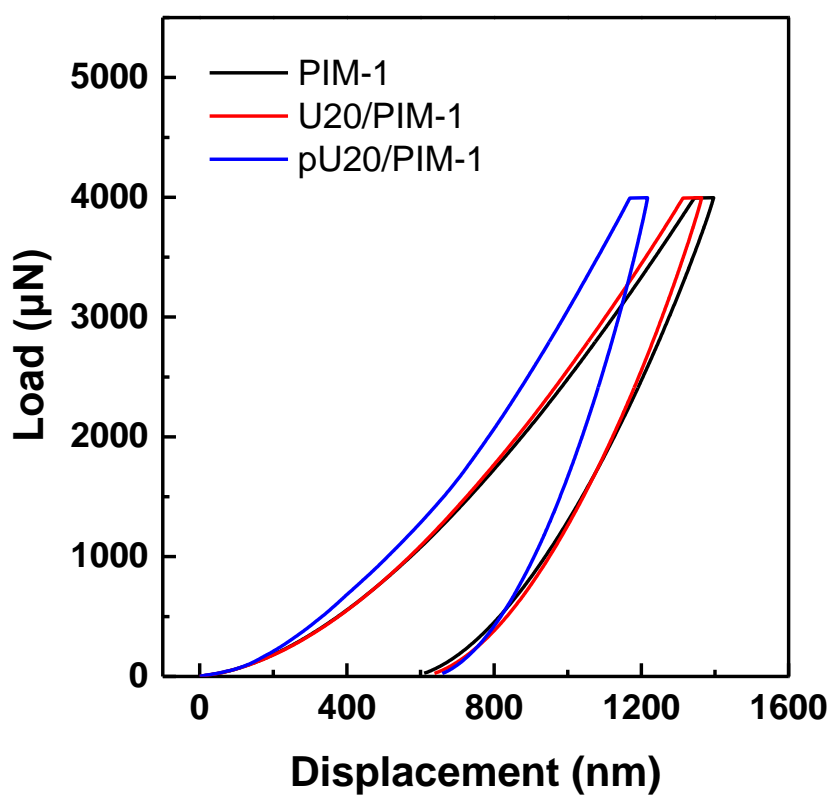

**Supplementary Fig. 21.** Load-displacement curves of PIM-1 and MMMs from nanoindentations tests.

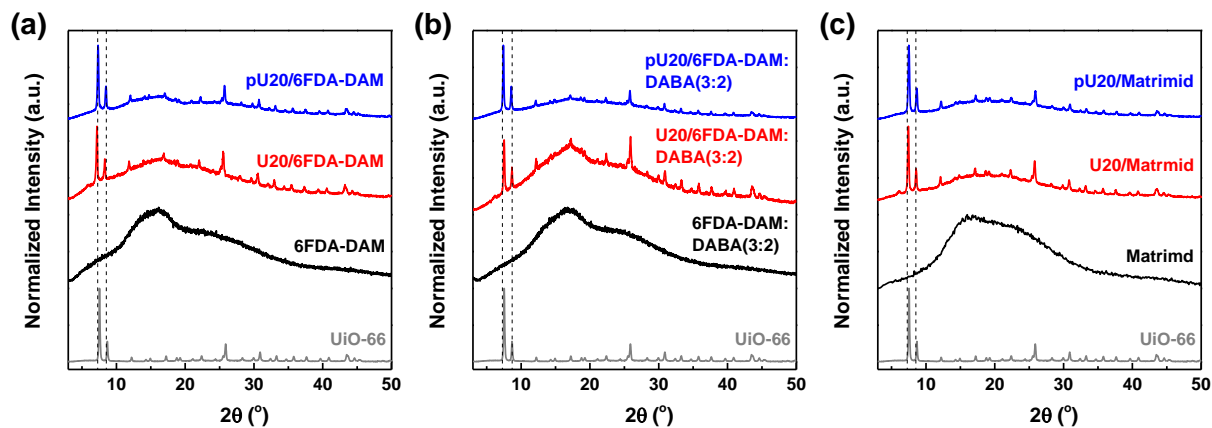

**Supplementary Fig. 22.** XRD spectra of (a) 6FDA-DAM, (b) 6FDA-DAM:DABA(3:2), and (c) Matrimid MMMs containing 20 wt.% of UiO-66 (U20) or polyUiO-66(4:1) nanoparticles, respectively.

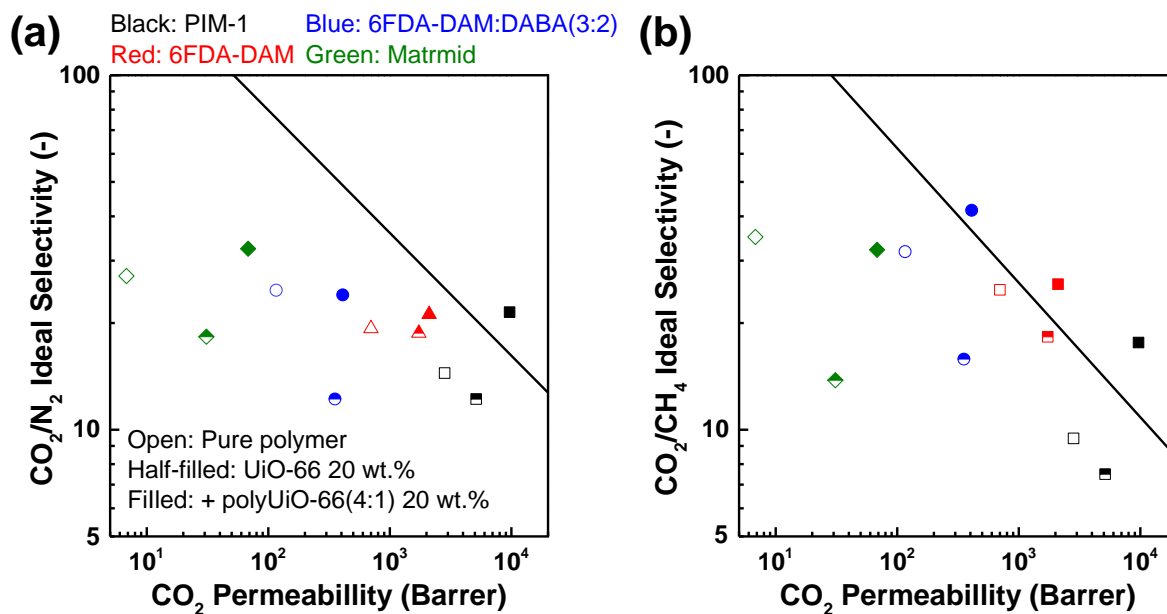

**Supplementary Fig. 23.** Pure-gas separation performances of pure polymers and MMMs plotted with 2008 Robeson upper bound for (a)  $\text{CO}_2/\text{N}_2$  and (b)  $\text{CO}_2/\text{CH}_4$  separation.

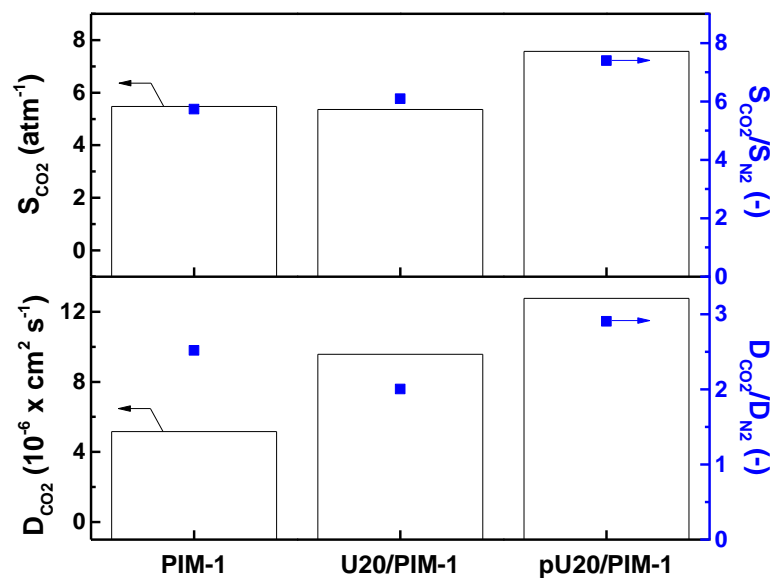

**Supplementary Fig. 24.** CO<sub>2</sub>/N<sub>2</sub> diffusivity selectivity ( $D_{\text{CO}_2}/D_{\text{N}_2}$ ) and solubility selectivity ( $S_{\text{CO}_2}/S_{\text{N}_2}$ ) of PIM-1, U20/PIM-1, and pU20/PIM-1.

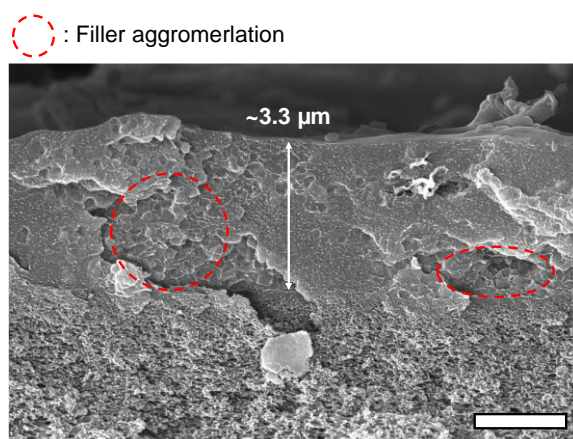

**Supplementary Fig. 25.** Cross-sectional SEM image of U20/PIM-1 TFN membranes (3×3 cm<sup>2</sup>) (scale bar = 2 μm).

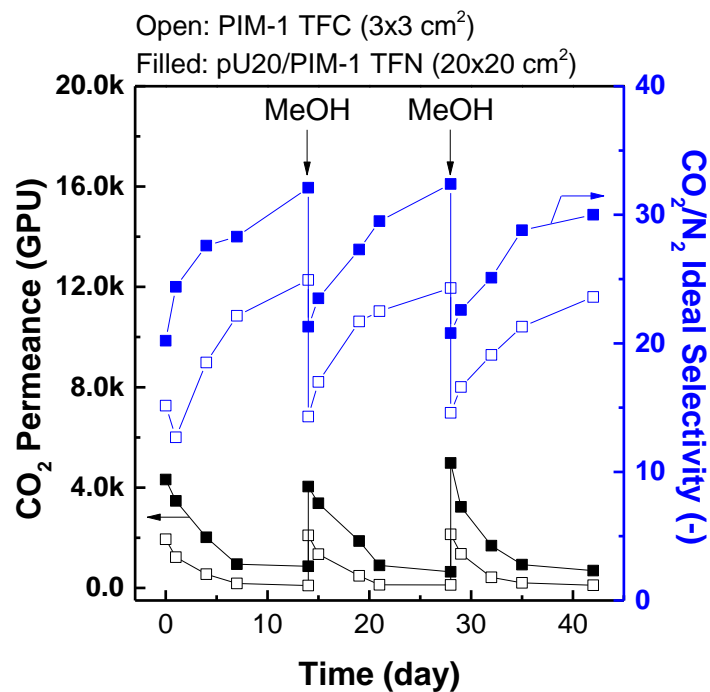

**Supplementary Fig. 26.** Long-term CO<sub>2</sub>/N<sub>2</sub> separation performances of PIM-1 TFC and pU20/PIM-1 TFN membranes with methanol-assisted rejuvenation of the 14-day-aged membranes. For rejuvenation, the aged membranes were soaked in methanol for 24 h and dried in a vacuum oven at room temperature for 24 h.



**Supplementary Table 1.** Molar ratios of the various reagents used in the MOF and polyMOF syntheses.

| Parental MOF             | Sample<br>(BDC:cPIM-1) | Metal source<br>(mmol)                                         | Organic (or polymer) ligand<br>(mmol) |                     | Solvent                             |
|--------------------------|------------------------|----------------------------------------------------------------|---------------------------------------|---------------------|-------------------------------------|
|                          |                        |                                                                | BDC                                   | cPIM-1 <sup>a</sup> | DMF                                 |
| UiO-66 <sup>b</sup>      | 1:0                    | ZrCl <sub>4</sub><br>: 0.35                                    | 0.35                                  | 0                   | 4 mL +<br>Formic<br>acid<br>0.39 mL |
|                          | 8:1                    |                                                                | 0.311                                 | 0.039               |                                     |
|                          | 4:1                    |                                                                | 0.28                                  | 0.07                |                                     |
|                          | 2:1                    |                                                                | 0.233                                 | 0.117               |                                     |
|                          | 0:1                    |                                                                | 0                                     | 0.35                |                                     |
| MOF-5 <sup>c</sup>       | 1:0                    | Zn(NO <sub>3</sub> ) <sub>2</sub> ·6H <sub>2</sub> O<br>: 1.20 | 0.20                                  | 0                   | 5 mL                                |
|                          | 8:1                    |                                                                | 0.178                                 | 0.022               |                                     |
|                          | 4:1                    |                                                                | 0.16                                  | 0.04                |                                     |
|                          | 2:1                    |                                                                | 0.133                                 | 0.067               |                                     |
|                          | 0:1                    |                                                                | 0                                     | 0.20                |                                     |
| MIL-101(Fe) <sup>d</sup> | 1:0                    | FeCl <sub>3</sub> ·6H <sub>2</sub> O<br>: 0.735                | 0.372                                 | 0                   | 4.5 mL                              |
|                          | 8:1                    |                                                                | 0.331                                 | 0.041               |                                     |
|                          | 4:1                    |                                                                | 0.298                                 | 0.075               |                                     |
|                          | 2:1                    |                                                                | 0.248                                 | 0.124               |                                     |
|                          | 0:1                    |                                                                | 0                                     | 0.372               |                                     |

a: molecular weight of repeating unit = 498 g/mol

b: reaction temperature: 120°C

c: reaction temperature: 100°C

d: reaction temperature: 110°C

**Supplementary Table 2.** Concentration of cPIM-1 in polyUiO-66(4:1) and polyUiO-66(0:1) calculated from TGA results.

| Sample          | Residual mass (wt.%) at 800 °C | Content of cPIM-1 (wt.%) |
|-----------------|--------------------------------|--------------------------|
| UiO-66          | 44.5                           | 0                        |
| cPIM-1          | 0.73                           | 100                      |
| polyUiO-66(4:1) | 33.7                           | 24.5                     |
| polyUiO-66(0:1) | 18.3                           | 59.9                     |

**Supplementary Table 3.** Concentration of cPIM-1 in polyMOF-5(4:1) and polyMOF-5(0:1) calculated from TGA results.

| Sample         | Residual mass (wt.%) at 800 °C | Content of cPIM-1 (wt.%) |
|----------------|--------------------------------|--------------------------|
| MOF-5          | 44.3                           | 0                        |
| cPIM-1         | 0.73                           | 100                      |
| polyMOF-5(4:1) | 21.8                           | 51.6                     |
| polyMOF-5(0:1) | 16.5                           | 63.8                     |

**Supplementary Table 4.** Concentration of cPIM-1 in polyMIL-101(4:1) and polyMIL-101(0:1) calculated from TGA results.

| Sample           | Residual mass (wt.%) at 800°C | Content of cPIM-1 (wt.%) |
|------------------|-------------------------------|--------------------------|
| MIL-101          | 29.7                          | 0                        |
| cPIM-1           | 0.73                          | 100                      |
| polyMIL-101(4:1) | 19.7                          | 34.5                     |
| polyMIL-101(0:1) | 9.3                           | 70.4                     |

**Supplementary Table 5.** Comparison of CO<sub>2</sub> adsorption at 298 K for various relevant materials.

| Adsorbent                       | BET surface area (m <sup>2</sup> g <sup>-1</sup> ) <sup>a</sup> | CO <sub>2</sub> uptake (mmol g <sup>-1</sup> ) <sup>b</sup> | CO <sub>2</sub> /N <sub>2</sub> Ideal selectivity (-) <sup>c</sup> | -Q <sub>st</sub> of CO <sub>2</sub> (kJ mol <sup>-1</sup> ) <sup>d</sup> | Ref.      |
|---------------------------------|-----------------------------------------------------------------|-------------------------------------------------------------|--------------------------------------------------------------------|--------------------------------------------------------------------------|-----------|
| UiO-66                          | 1492                                                            | 1.69                                                        | 11.8                                                               | 28.4                                                                     | This work |
| polyUiO-66(4:1)                 | 1342                                                            | 1.79                                                        | 14.2                                                               | 26.9                                                                     | This work |
| UiO-66(Hf)                      | 940                                                             | 1.50                                                        | 11.5                                                               | 22.8                                                                     | 6         |
| UiO-66(Hf)-NH <sub>2</sub>      | 1067                                                            | 2.80                                                        | 11.2                                                               | 25.6                                                                     | 6         |
| UiO-66(Hf)-(OH) <sub>2</sub>    | 922                                                             | 4.06                                                        | 13.1                                                               | 28.4                                                                     | 6         |
| UiO-66(Hf)-(COOH) <sub>2</sub>  | 378                                                             | 1.20                                                        | 9.2                                                                | 28.2                                                                     | 6         |
| UiO-66(Hf)-(F) <sub>4</sub>     | 329                                                             | 0.82                                                        | 8.2                                                                | 23.4                                                                     | 6         |
| UiO-66                          | 1730                                                            | 2.20                                                        | 12.9                                                               | 23.3                                                                     | 7         |
| UiO-66-(COOLi) <sub>2</sub> -EX | 870                                                             | 1.65                                                        | 13.8                                                               | 26.3                                                                     | 7         |
| UiO-66-(COONa) <sub>2</sub> -EX | 869                                                             | 1.98                                                        | 11.3                                                               | 27.7                                                                     | 7         |
| UiO-66-(COOK) <sub>2</sub> -EX  | 554                                                             | 1.33                                                        | 12.1                                                               | 24.0                                                                     | 7         |
| UiO-66-(COOLi) <sub>4</sub> -EX | 970                                                             | 2.34                                                        | 11.1                                                               | 27.5                                                                     | 7         |
| UiO-66-(COONa) <sub>4</sub> -EX | 639                                                             | 1.20                                                        | 10.0                                                               | 23.0                                                                     | 7         |
| UiO-66-(COOK) <sub>4</sub> -EX  | 204                                                             | 0.61                                                        | 10.2                                                               | 24.3                                                                     | 7         |
| UiO-66                          | 1120                                                            | 1.79                                                        | 11.2                                                               | ~25                                                                      | 8         |
| UiO-66-NH <sub>2</sub>          | 1187                                                            | 2.98                                                        | 13.5                                                               | ~28                                                                      | 8         |
| UiO-66-1,4-Naph                 | 766                                                             | 1.54                                                        | 12.8                                                               | ~26                                                                      | 8         |
| UiO-66-2,5-(OMe) <sub>2</sub>   | 899                                                             | 2.63                                                        | 13.2                                                               | ~32                                                                      | 8         |

a: Measured from N<sub>2</sub> adsorption isotherms at 77 K.

b: Measured from CO<sub>2</sub> adsorption isotherms at 298 K and 1 bar.

c: The single gas ideal selectivity ( $\alpha$ ) in (c) was calculated as  $\alpha = N_{CO_2}/N_{N_2}$  where  $N_{CO_2}$  and  $N_{N_2}$  represent the adsorption amount of CO<sub>2</sub> and N<sub>2</sub> at a certain equilibrium pressure at 298 K.<sup>5</sup>

d: The isosteric heat (-Q<sub>st</sub>) of CO<sub>2</sub> adsorption was calculated from the Clausius-Clapeyron equation.<sup>5</sup>

## Supplementary references

1. Rodriguez, K. M. et al. Facile and time-efficient carboxylic acid functionalization of PIM-1: Effect on molecular packing and gas separation performance. *Macromolecules* **53**, 6220-6234 (2020).
2. Greer, H. F. Liu, Y. Greenaway, A. Wright, P. A. Zhou, W. Synthesis and formation mechanism of textured MOF-5. *Cryst. Growth Des.* **16**, 2104-2111 (2016).
3. Li, Z. Liu, X. Jin, W. Hu, Q. Zhao, Y. Adsorption behavior of arsenicals on MIL-101(Fe): The role of arsenic chemical structures. *J. Colloid Interface Sci.* **554**, 692-704 (2019).
4. Arjmandi, M. & Pakizeh, M. Mixed matrix membranes incorporated with cubic-MOF-5 for improved polyetherimide gas separation membranes: Theory and experiment. *J. Ind. Eng. Chem.* **20**, 3857-3868 (2014).
5. Han, G. Rodriguez, K. M. Qian, Q. Smith, Z. P. Acid-modulated synthesis of high surface area amine-functionalized MIL-101(Cr) nanoparticles for CO<sub>2</sub> separations. *Ind. Eng. Chem. Res.* **59**, 18139-18150 (2020).
6. Hu, Z. Nalaparaju, A. Peng, Y. Jiang, J. Zhao, D. Modulated hydrothermal synthesis of UiO-66(Hf)-type metal-organic frameworks for optimal carbon dioxide separation. *Inorg. Chem.* **55**, 1134-1141 (2016).
7. Hu, Z. Faucher, S. Zhuo, Y. Sun, Y. Wang, S. Zhao, D. Combination of optimization and metalated-ligand exchange: An effective approach to functionalize UiO-66(Zr) MOFs for CO<sub>2</sub> separation. *Chem. Eur. J.* **21**, 17246-17255 (2015).
8. Cmarik, G. E. Kim, M. Cohen, S. M. Walton, K. S. Tuning the adsorption properties of UiO-66 via ligand functionalization. *Langmuir* **28**, 15606-15613 (2012).
